# Supplementary material for: A Receptor Integrin β1 Promotes Infection of Avian Metapneumovirus Subgroup C by Recognizing a Viral Fusion Protein RSD Motif
Source: MDPI journal article supplement (doi:10.3390/ijms25020829), 2024-01-09
Supplement: s1 [file s1]

## **Supplementary Figure Captions**

**Figure S1.** Relationship between different metapneumovirus was deduced using the F genes. The ML tree was reconstructed using IQtrees. The different metapneumovirus are expressed by different colors. The conserved integrin-binding motifs located in the F protein were all labeled behind the phylogenetic tree.

**Figure S2.** (A) F protein structure of aMPV/C predicted using AlphaFold2. The F protein includes three regions, F0, F1, and F2, where F0 is the splicing region. (B) Location of the RSD motif in the F protein.

**Figure S3.** F protein structures of hMPV and aMPV/C. A comparison of the structures of the two viruses predicted by AlphaFold2.

**Figure S4.** aMPV/C F protein can bind with hITGB1. POCASA 1.1 was used to predict the binding sites, and AutoDock Vina1.1.2 was used for docking.
